# Supplementary material
Source: PubMed Central journal article supplement (PMC7854514)

## Supplementary Materials

### Appendix 1: Search Strategy

#### PubMed

(VTE[tiab] OR venous thromboembolism[tiab] OR DVT[tiab] OR deep vein thrombosis[tiab] OR PE[tiab] OR pulmonary embolism[tiab] OR “thromboembolism”[MeSH])

AND

(prevention[tiab] OR prophylaxis[tiab] OR lovenox[tiab] OR heparin[tiab] OR enoxaparin[tiab] OR anticoagulant[tiab] OR anticoagulants[MeSH] OR mechanical[tiab] OR “heparin”[MeSH] OR tinzaparin[tiab] OR dalteparin[tiab] OR Fragmin[tiab] OR Innohep[tiab])

AND

(Gynecolog\*[tiab] OR Gynaecolog\*[tiab] OR Gynecologic Oncolog\*[tiab] OR “gynecology”[MeSH] OR “Genital Neoplasms, Female/surgery”[MeSH])

NOT

(obstetric\*[tiab] OR cesarean[tiab])

#### EMBASE

(VTE:ti,ab OR ‘venous thromboembolism’:ti,ab OR DVT:ti,ab OR ‘deep vein thrombosis’:ti,ab OR PE:ti,ab OR ‘pulmonary embolism’:ti,ab OR ‘venous thromboembolism’/mj)

AND

(prevention:ti,ab OR prophylaxis:ti,ab OR lovenox:ti,ab OR heparin:ti,ab OR enoxaparin:ti,ab OR anticoagulant:ti,ab OR ‘anticoagulant agent’/mj OR mechanical:ti,ab OR ‘heparin derivative’/mj OR tinzaparin:ti,ab OR dalteparin:ti,ab OR Fragmin:ti,ab OR Innohep:ti,ab)

AND

(Gynecolog\*:ti,ab OR Gynaecolog\*:ti,ab OR Gynecologic Oncolog\*:ti,ab OR ‘gynecologic disease’/mj OR ‘female genital tract tumor’/mj)

NOT

(obstetric\*:ti,ab OR cesarean:ti,ab)

**Table 2. Quality assessment of the included studies**

| First author             | Selection        | Comparability | Exposure | Quality Assessment |
|--------------------------|------------------|---------------|----------|--------------------|
| <b>Ailawadi</b>          | ***              | **            | **       | High               |
| <b>Bouchard-Fourtier</b> | ***              | -             | **       | Poor               |
| <b>Clarke-Pearson</b>    | ***              | **            | ***      | High               |
| <b>Corr</b>              | **               | **            | **       | High               |
| <b>Einstein</b>          | ***              | *             | ***      | High               |
| <b>Freeman</b>           | ***              | **            | ***      | High               |
| <b>Hansen</b>            | ***              | **            | ***      | High               |
| <b>Hopp</b>              | **               | *             | -        | Poor               |
| <b>Maxwell</b>           | RCT 3/5<br>Jadad |               |          |                    |
| <b>Pelkofski</b>         | ***              | **            | -        | Poor               |
| <b>Piver</b>             | ***              | -             | *        | Poor               |
| <b>Renata</b>            | ***              | -             | *        | Poor               |
| <b>Swenson</b>           | ***              | -             | **       | Poor               |
| <b>Ugaki</b>             | ****             | -             | -        | Poor               |
| <b>Whitworth</b>         | ***              | -             | *        | Poor               |

**Figure 5. Forest plot of subgroup analysis comparing preoperative use of UFH versus LMWH as pre-operative chemoprophylaxis.**

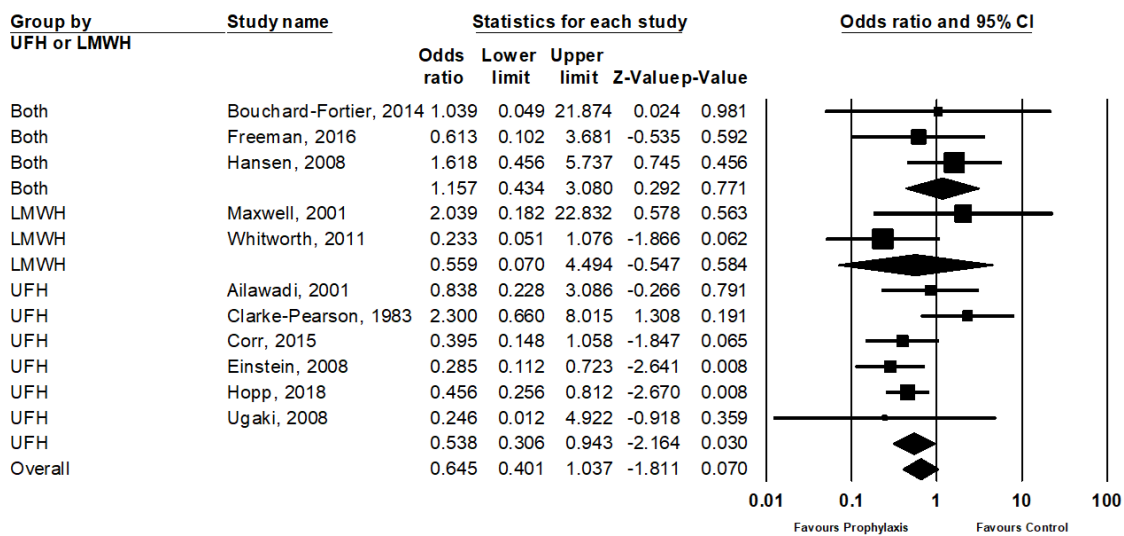

**Figure 6. Forest plot of subgroup analysis of VTE comparing pre-operative chemoprophylaxis by those studies that controlled for post-operative prophylaxis (equivalent post-operative care) and those that did not (non-equal post-operative care)**

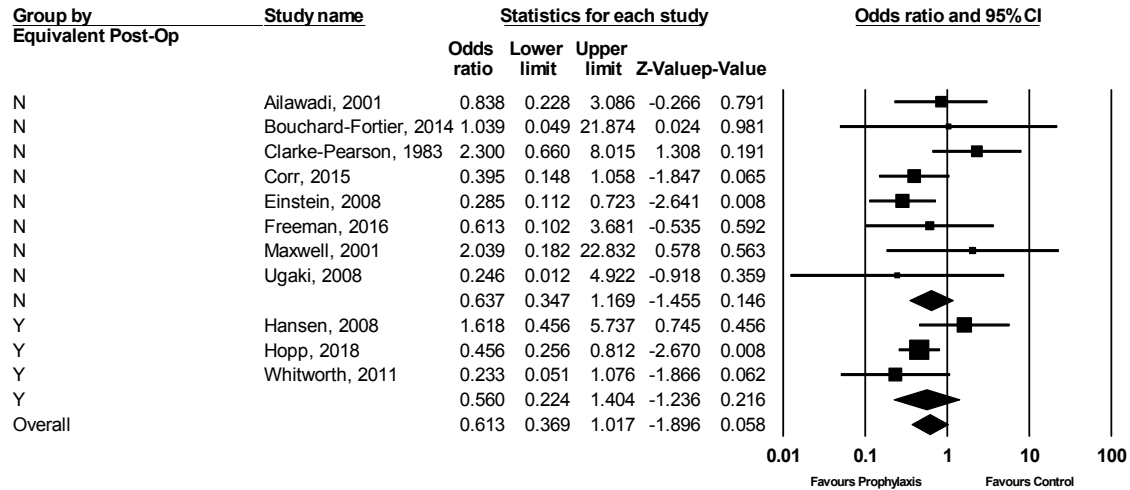

**Figure 7. Forest plot of subgroup analysis of VTE by studies with concurrent use of sequential compression devices (SCD) or not.**

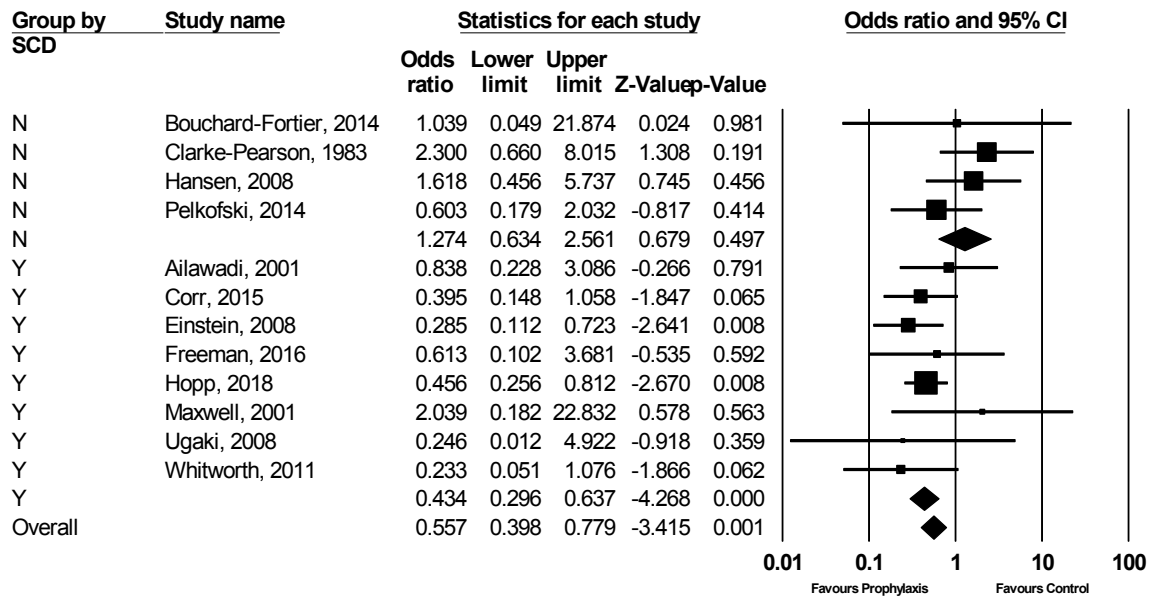

**Figure 8. Forest plot of subgroup analysis according to quality of studies**

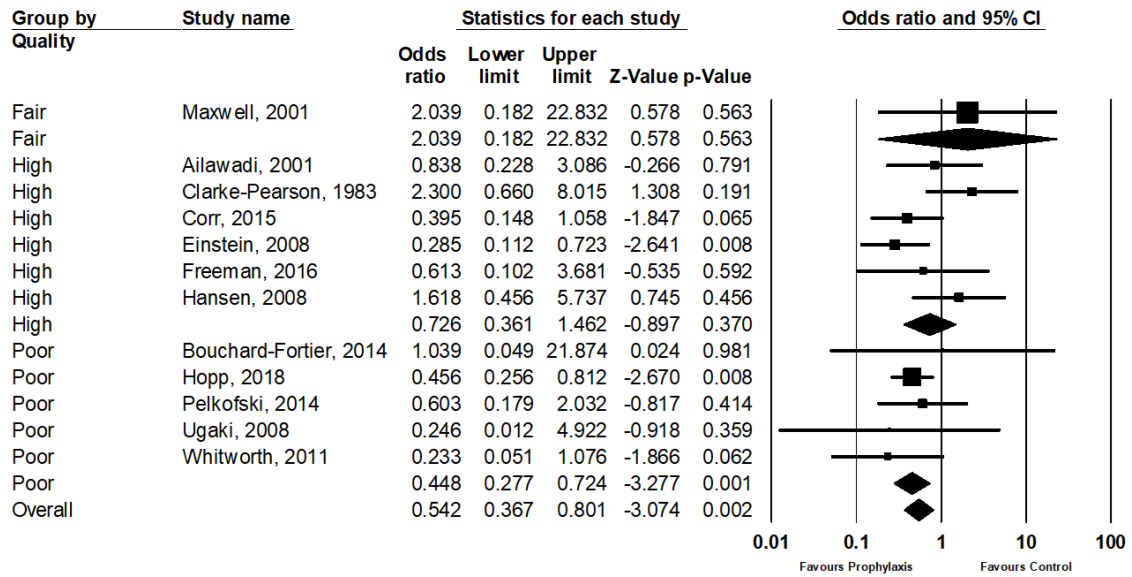

Supplement: NIHMS1651065-supplement-Supplementary_materials.pdf [file NIHMS1651065-supplement-Supplementary_materials.pdf]
